# Supplementary material for: Additive manufactured push‐fit implant fixation with screw‐strength pull out
Source: PubMed Central journal article supplement (PMC6175131; doi:10.1002/jor.23771), 2017-11-22
Supplement: JOR-36-1508-s002.pdf [file JOR-36-1508-s002.pdf]

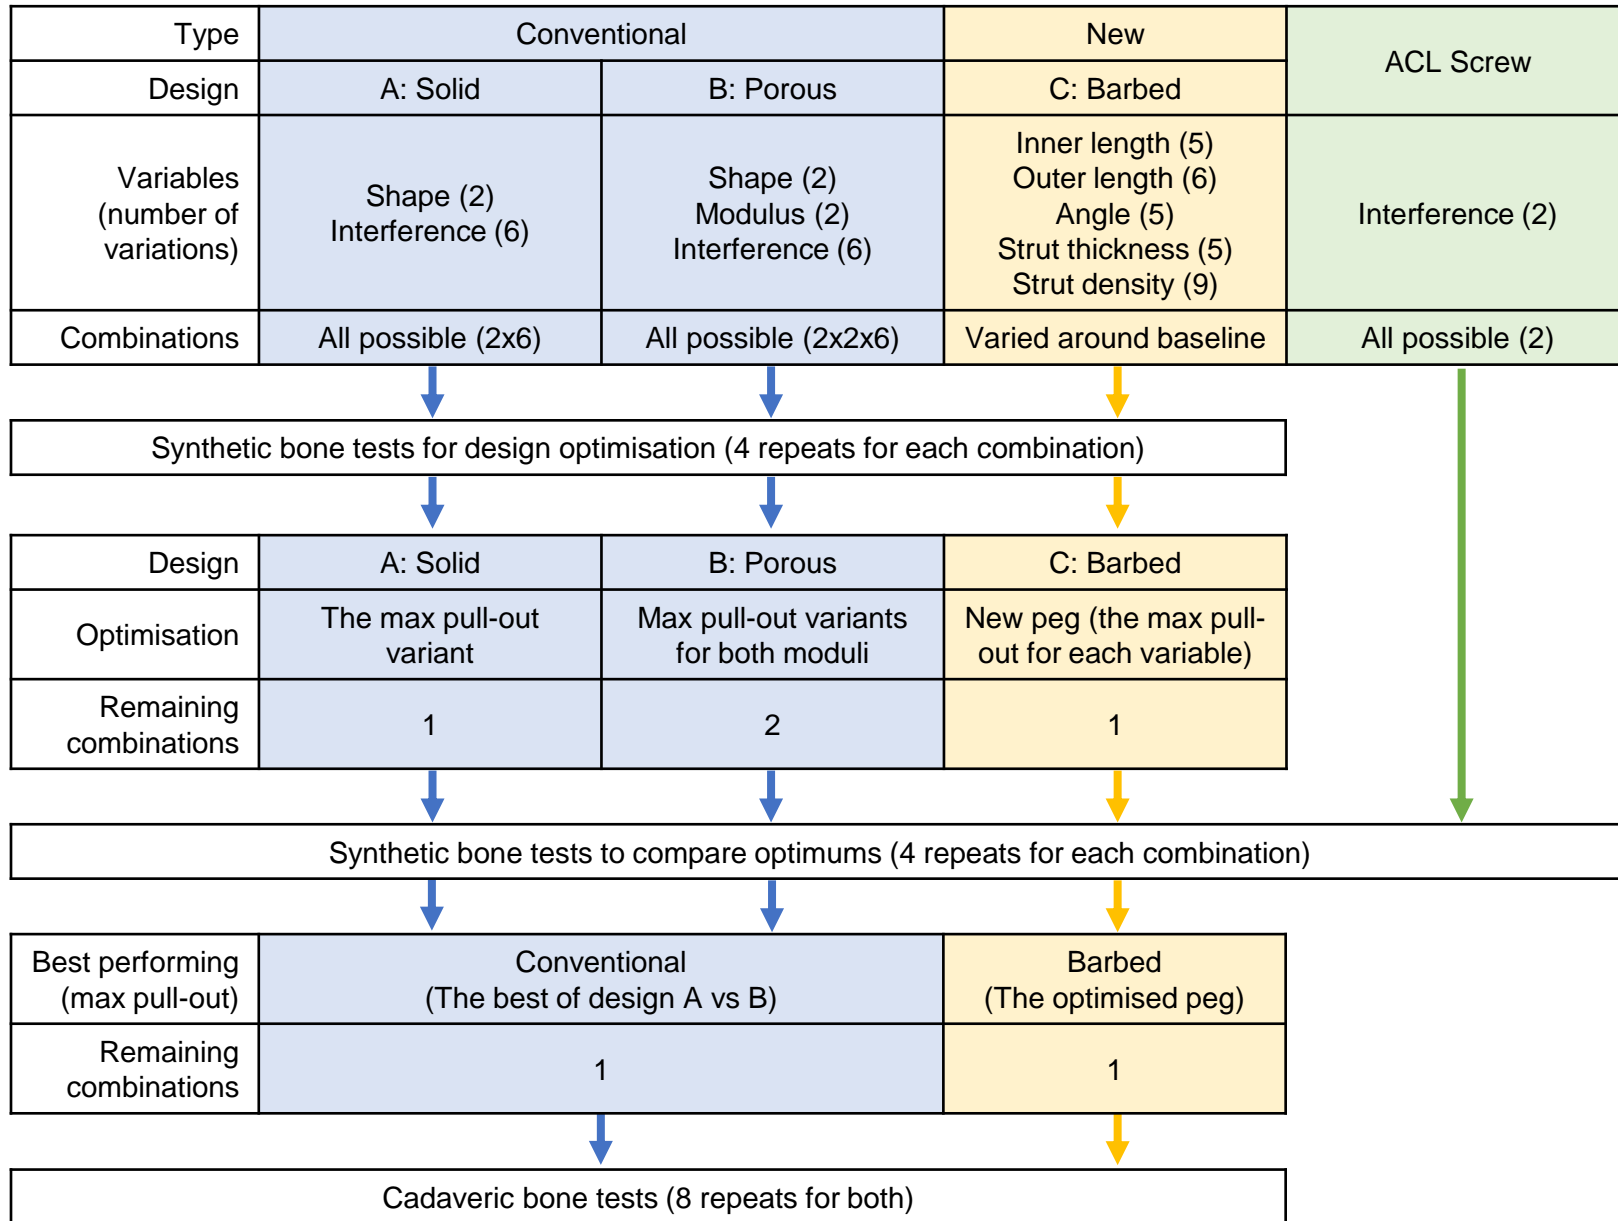

Figure S1: An overview of the tests performed
